# Supplementary material
Source: Royal Society of Chemistry journal article supplement (doi:10.1039/d5cp04018c)
Supplement: d5cp04018c2.pdf [file d5cp04018c2.pdf]

## SUPPLEMENTARY INFORMATION

# Computational Insights into the pH-Dependent Behavior of Ipilimumab-CTLA-4

Wanda Destiarani<sup>a</sup>, Kowit Hengphasatporn<sup>b</sup>, Yasuteru Shigeta<sup>b</sup>, and Ryuhei Harada<sup>\*b</sup>

<sup>a</sup> Doctoral Program in Biology, University of Tsukuba, Tsukuba, Ibaraki 305-8572, Japan

<sup>b</sup> Center for Computational Sciences, University of Tsukuba, Tsukuba, Ibaraki 305-8577, Japan

\*Corresponding Author: ryuhei@ccs.tsukuba.ac.jp

**Table S1.** The protonation state assigned to each mutated residue in the light and heavy chains of all Ipilimumab variants for their molecular dynamics (MD) simulations using PROPKA3. Each residue name corresponds to the Amber format.

| Variant | Residue | pKa Calculation<br>using PROPKA3 | Partial Protonation<br>(pH 6.0) |        | Full Protonation<br>(pH 4.5) |        |
|---------|---------|----------------------------------|---------------------------------|--------|------------------------------|--------|
|         |         |                                  | Physiological                   | Acidic | Physiological                | Acidic |
| Ipi95   | HIS 31  | 7.17                             | HID                             | HIP    | HID                          | HIP    |
|         | HIS 56  | 6.70                             | HID                             | HIP    | HID                          | HIP    |
|         | THR 99  | –                                | THR                             | THR    | THR                          | THR    |
|         | GLU 28  | 3.46                             | GLU                             | GLU    | GLU                          | GLH    |
|         | ASP 31  | 3.86                             | ASP                             | ASP    | ASP                          | ASH    |
|         | GLU 33  | 4.73                             | GLU                             | GLU    | GLU                          | GLH    |
| Ipi105  | HIS 31  | 6.27                             | HID                             | HIP    | HID                          | HIP    |
|         | HIS 56  | 6.92                             | HID                             | HIP    | HID                          | HIP    |
|         | THR 99  | –                                | THR                             | THR    | THR                          | THR    |
|         | GLU 28  | 3.36                             | GLU                             | GLU    | GLU                          | GLH    |
|         | GLU 31  | 4.77                             | GLU                             | GLU    | GLU                          | GLH    |
|         | GLU 33  | 5.17                             | GLU                             | GLU    | GLU                          | GLH    |
| Ipi106  | HIS 31  | 7.08                             | HID                             | HIP    | HID                          | HIP    |
|         | HIS 56  | 7.08                             | HID                             | HIP    | HID                          | HIP    |
|         | HIS 99  | 4.34                             | HID                             | HIP    | HID                          | HIP    |
|         | GLU 28  | 3.32                             | GLU                             | GLU    | GLU                          | GLH    |
|         | GLU 31  | 4.66                             | GLU                             | GLU    | GLU                          | GLH    |
|         | GLU 33  | 4.59                             | GLU                             | GLU    | GLU                          | GLH    |

**Figure S1.** Surface potentials of the antigen–antibody interfaces in all variants (Ipi95, Ipi105, Ipi106) under physiological and acidic conditions, comparing their partial and full protonation states. The surface potentials were calculated using the APBS program in PDB2PQR webserver,<sup>1</sup> and visualized using Biovia Discovery Studio 2024.<sup>2</sup>

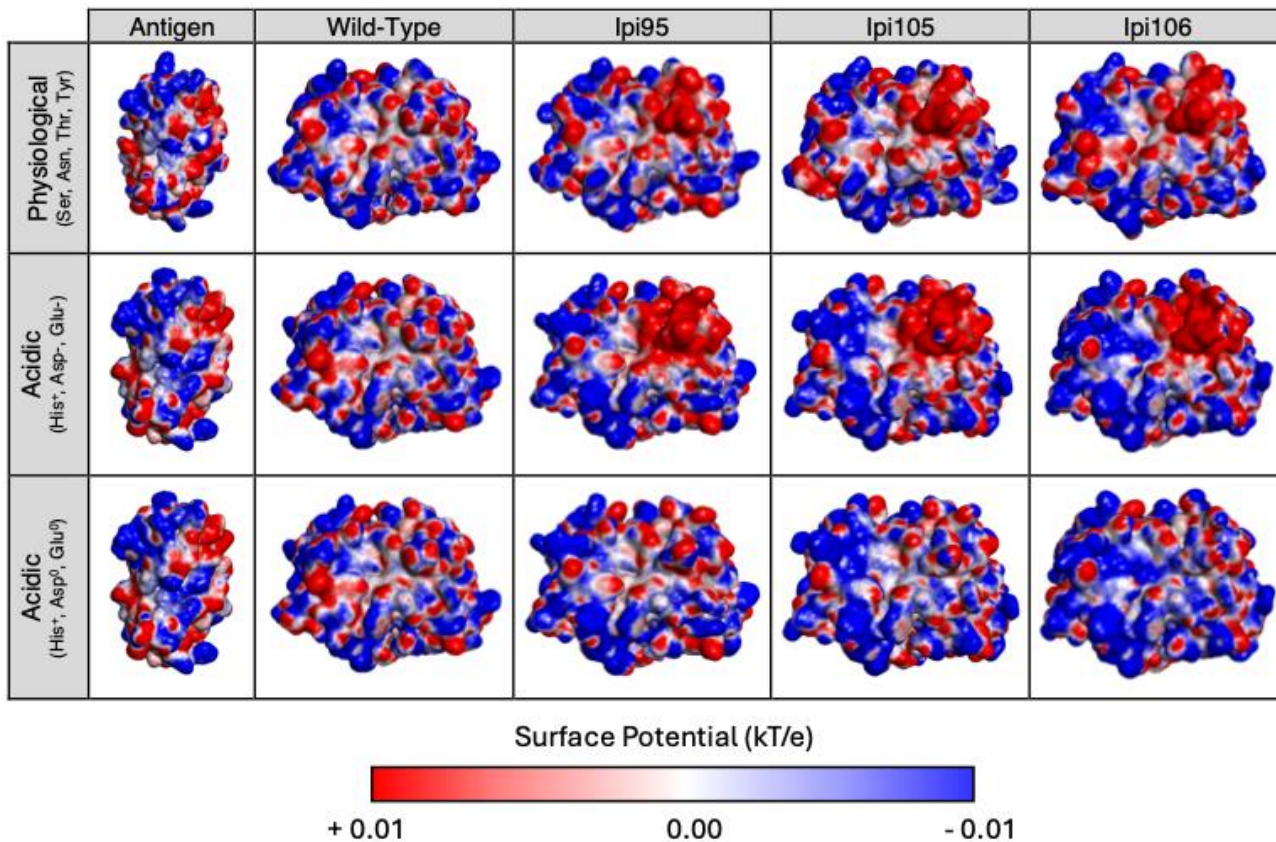

**Table S2.** The average MM/GBSA-based binding energy values of Ipilimumab–CTLA-4 complex binding in physiological and acidic conditions.

| Variant   | $\Delta G_{\text{MM/GBSA}}^* \pm \text{SE (kcal}\cdot\text{mol}^{-1})$ |                     |                     |
|-----------|------------------------------------------------------------------------|---------------------|---------------------|
|           | Physiological                                                          | Acidic              |                     |
|           | pH 7.4                                                                 | pH 6.0              | pH 4.5              |
| Wild-Type | $-12.9525 \pm 1.71$                                                    | $-16.9126 \pm 0.99$ | $-16.9126 \pm 0.99$ |
| Ipi95     | $-12.2721 \pm 1.21$                                                    | $-16.8602 \pm 1.14$ | $-20.2615 \pm 1.73$ |
| Ipi105    | $-10.2512 \pm 2.35$                                                    | $-17.9574 \pm 1.00$ | $-19.5213 \pm 2.78$ |
| Ipi106    | $-12.4499 \pm 2.46$                                                    | $-18.8817 \pm 3.19$ | $-19.6413 \pm 1.35$ |

**Figure S2.** (A) Profiles of root-mean-square deviation (RMSD) and (B) root-mean-square fluctuation (RMSF) for the antigen–antibody complexes, calculated using over five 500-ns MD replicas.<sup>5</sup> Blue and red lines represent the physiological and acidic conditions, respectively; bold lines show mean values, while lighter lines indicate individual replicas. Profiles of RMSF were compared with the Wild-Type. Graphs were generated using ggplot<sup>2</sup> in JupyterLab.<sup>4</sup>

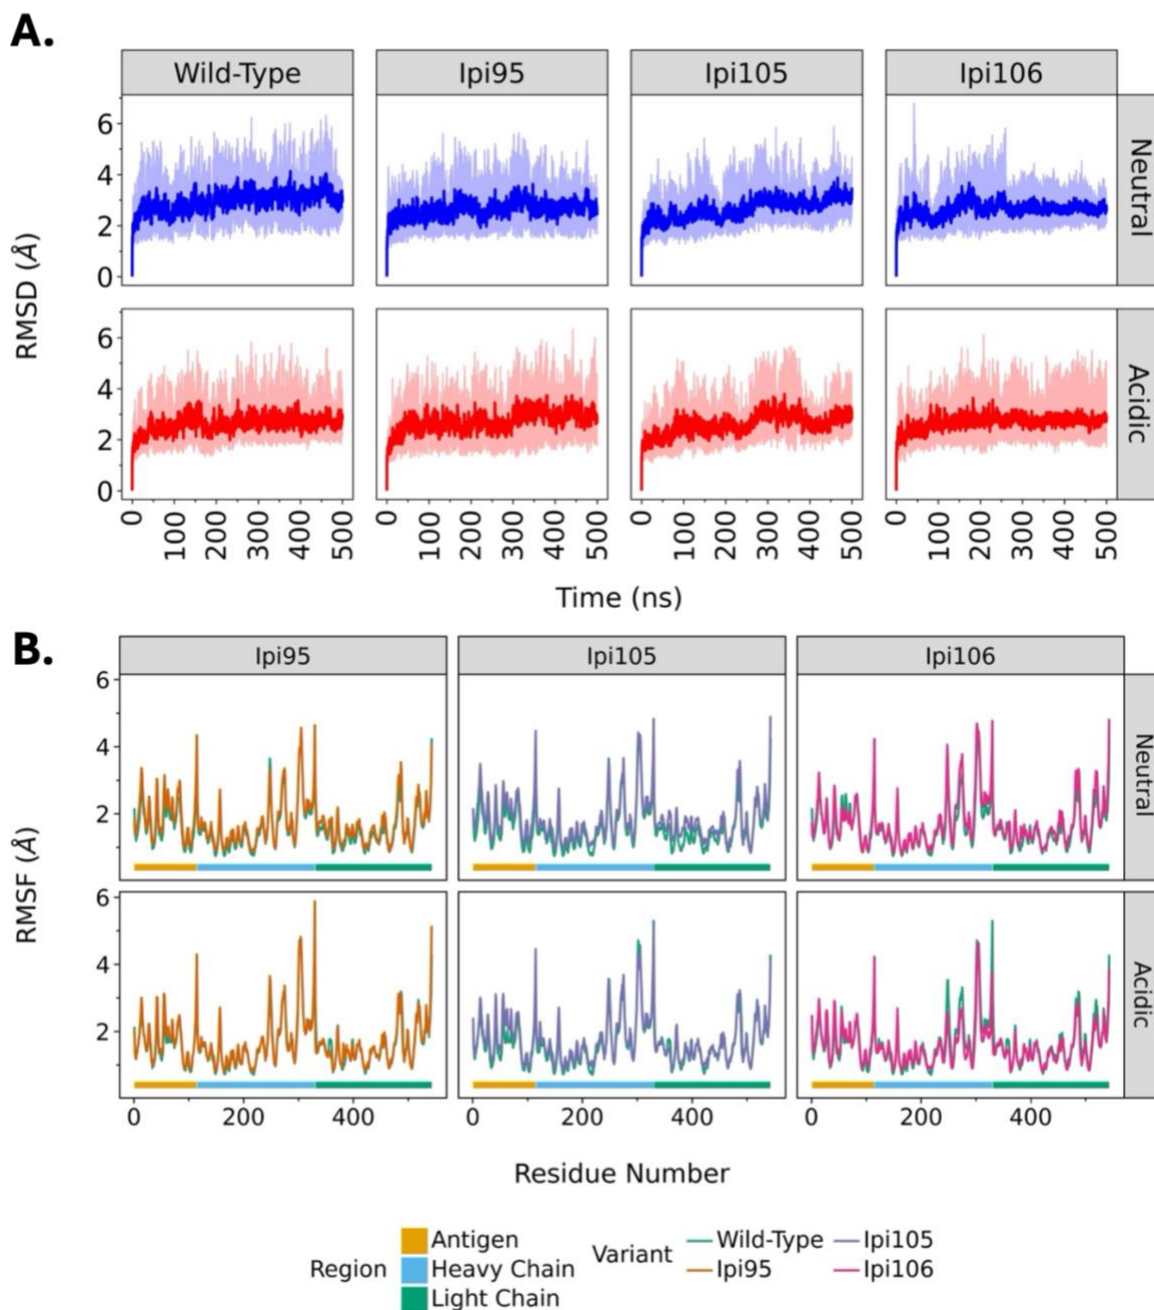

**Table S3.** Statistical analysis of MM/GBSA-based binding energy values to compare Ipilimumab–CTLA-4 complex binding in physiological and acidic conditions.

| Saphiro-Wilk test for normality                                                           |              |                                 |                |               |                |
|-------------------------------------------------------------------------------------------|--------------|---------------------------------|----------------|---------------|----------------|
| No                                                                                        | Variants     | <i>p</i> -value > 0.05 = normal |                |               |                |
|                                                                                           |              | Physiological                   |                | Acidic        |                |
| 1                                                                                         | Wild-Type    | 0.0141                          |                | 0.0752        |                |
| 2                                                                                         | Ipi95        | 0.1154                          |                | 0.0141        |                |
| 3                                                                                         | Ipi105       | 0.0075                          |                | 0.0392        |                |
| 4                                                                                         | Ipi106       | 0.3702                          |                | 0.5367        |                |
| Trimmed - Mean Permutation test for difference between physiological and acidic condition |              |                                 |                |               |                |
| No                                                                                        | Variants     | <i>p</i> -value                 |                | Significancy  |                |
| 1                                                                                         | Wild-Type    | 0.4133                          |                | ns            |                |
| 2                                                                                         | Ipi95        | 0.0028                          |                | **            |                |
| 3                                                                                         | Ipi105       | 0.0082                          |                | **            |                |
| 4                                                                                         | Ipi106       | 0.0056                          |                | **            |                |
| Cohen's d and Cliff's Delta test for practical significance                               |              |                                 |                |               |                |
| No                                                                                        | Variants     | Cohen's d                       |                | Cliff's Delta |                |
| 1                                                                                         | Wild-Type    | 0.5675                          | (Medium)       | 0.2096        | (Small)        |
| <b>2</b>                                                                                  | <b>Ipi95</b> | <b>1.0721</b>                   | <b>(Large)</b> | <b>0.5200</b> | <b>(Large)</b> |
| 3                                                                                         | Ipi105       | 0.7212                          | (Medium)       | 0.3696        | (Medium)       |
| 4                                                                                         | Ipi106       | 0.7243                          | (Medium)       | 0.3888        | (Medium)       |

**Figure S3.** Distributions of radius of gyration ( $R_g$ ) of the antigen–antibody interfaces calculated using CPPTRAJ for over five 500-ns MD replicas.<sup>5</sup> The values of  $R_g$  reflect the compactness of binding in the physiological (blue) and acidic conditions (red). Graphs were generated using ggplot2 in JupyterLab.<sup>4</sup>

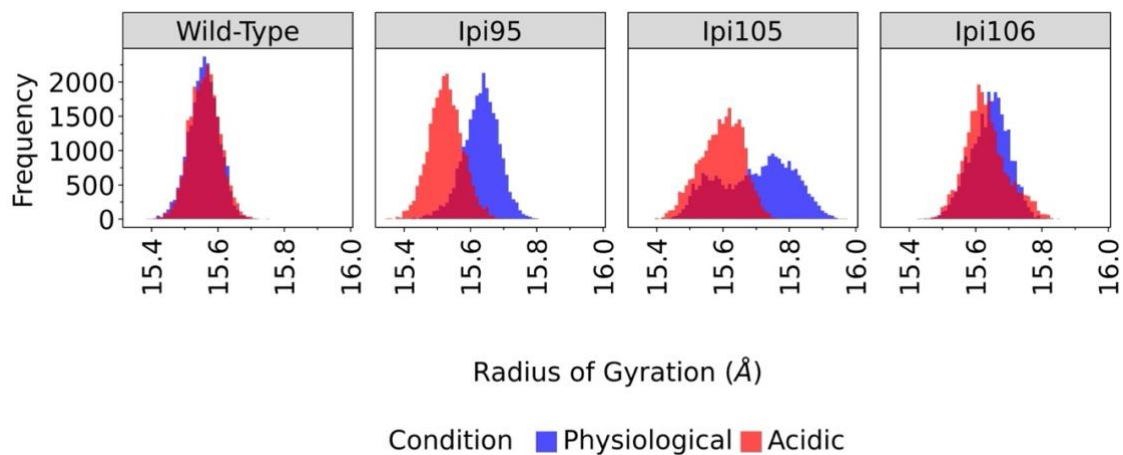

**Table S4.** Residue interaction network analyses of all Ipilimumab variants under the physiological and acidic conditions based on the trajectories of 500-ns MD simulations using RING4.0.<sup>7</sup>

| Mutation   | Amino Acid | Condition     | RIN Analysis* |        |        |        | Results                 |
|------------|------------|---------------|---------------|--------|--------|--------|-------------------------|
|            |            |               | Wild-Type     | Ipi95  | Ipi105 | Ipi106 |                         |
| H – S31H   | S31        | Physiological | Green         | Grey   | Grey   | Grey   | No difference           |
|            |            | Acidic        | Green         | Grey   | Grey   | Grey   |                         |
|            | H31        | Physiological | Grey          | Blue   | Blue   | Blue   | Better in Physiological |
|            |            | Acidic        | Grey          | Green  | Green  | Yellow |                         |
| H – N56H   | N56        | Physiological | Blue          | Grey   | Grey   | Grey   | No difference           |
|            |            | Acidic        | Blue          | Grey   | Grey   | Grey   |                         |
|            | H56        | Physiological | Grey          | Blue   | Grey   | Grey   | Better in Acidic        |
|            |            | Acidic        | Grey          | Blue   | Green  | Grey   |                         |
| H – T99H   | T99        | Physiological | Yellow        | Yellow | Yellow | Grey   | Better in Acidic        |
|            |            | Acidic        | Yellow        | Green  | Green  | Grey   |                         |
|            | H99        | Physiological | Grey          | Grey   | Grey   | Blue   | No difference           |
|            |            | Acidic        | Grey          | Grey   | Grey   | Blue   |                         |
| L – S28E   | S28        | Physiological | Grey          | Grey   | Grey   | Grey   | No difference           |
|            |            | Acidic        | Grey          | Grey   | Grey   | Grey   |                         |
|            | E28        | Physiological | Grey          | Grey   | Grey   | Grey   | No difference           |
|            |            | Acidic        | Grey          | Grey   | Grey   | Grey   |                         |
| L – S31E/D | S31        | Physiological | Blue          | Grey   | Grey   | Grey   | Better in Physiological |
|            |            | Acidic        | Grey          | Grey   | Grey   | Grey   |                         |
|            | E31        | Physiological | Grey          | Grey   | Grey   | Grey   | Better in Acidic        |
|            |            | Acidic        | Grey          | Grey   | Blue   | Grey   |                         |
|            | D31        | Physiological | Grey          | Blue   | Grey   | Grey   | Better in Physiological |
|            |            | Acidic        | Grey          | Grey   | Grey   | Grey   |                         |
| L – Y33E   | Y33        | Physiological | Yellow        | Grey   | Grey   | Grey   | Better in Acidic        |
|            |            | Acidic        | Blue          | Grey   | Grey   | Grey   |                         |
|            | E33        | Physiological | Grey          | Blue   | Blue   | Blue   | No difference           |
|            |            | Acidic        | Grey          | Blue   | Blue   | Blue   |                         |

\*Different colors represent the interaction type in each residue. Grey: blank cells; White: no interaction; Yellow: intermolecular interaction; Green: indirect interaction; Blue: direct interaction. This analysis categorizes residue types from the least to the most favorable interactions between each antigen-antibody pair.

**Figure S4.** Correlation between experimental and computational average binding energy values for all Ipilimumab variants based on MM/GBSA method ( $\Delta G_{\text{MM/GBSA}}$ ), calculated using MMPBSA.py<sup>3</sup> and visualized via linear regression in ggplot2.<sup>4</sup> Blue (red) dots represent values under the physiological (acidic) conditions in partial (A) and full protonation state (B).

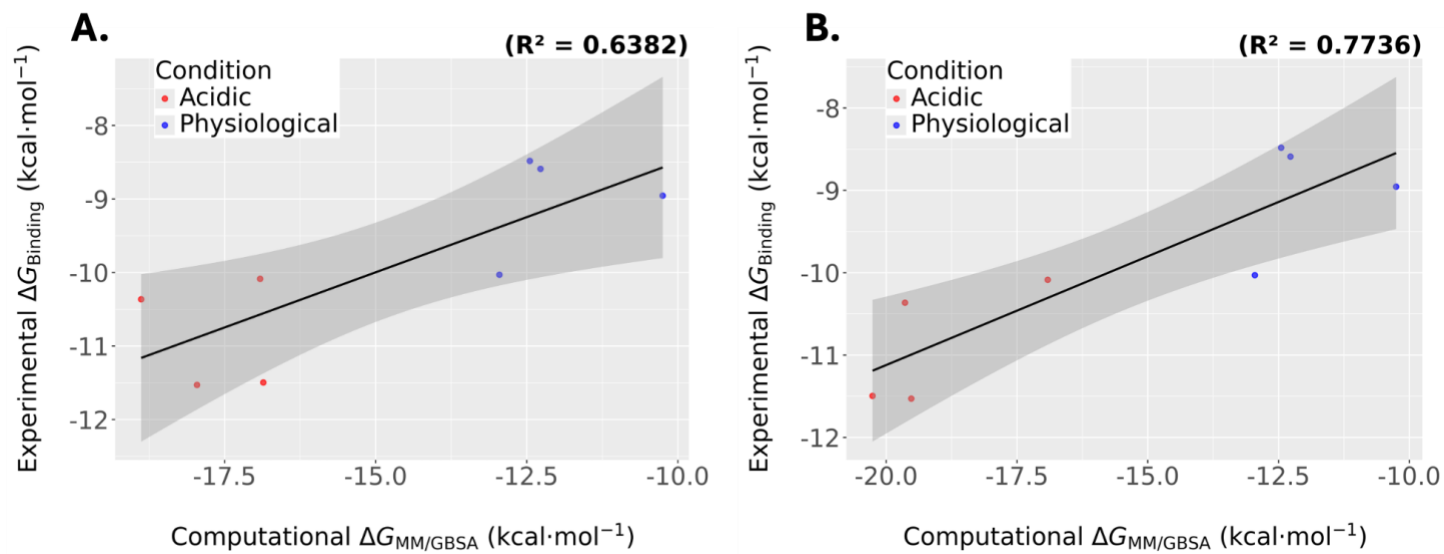

**Figure S5.** Representative-structure selection based on clustering analysis of five simulation replicas. Clustering was performed on the combined trajectories of five independent replicas for each variant under physiological and acidic conditions using *K*-means clustering in CPPTRAJ.<sup>5</sup> The populations of the major clusters are shown for Wild-Type, Ipi95, Ipi105, and Ipi106. The most populated cluster, highlighted in each panel, was used to define the representative structure shown for each system. The plot was created with ggplot2 in JupyterLab.<sup>4</sup>

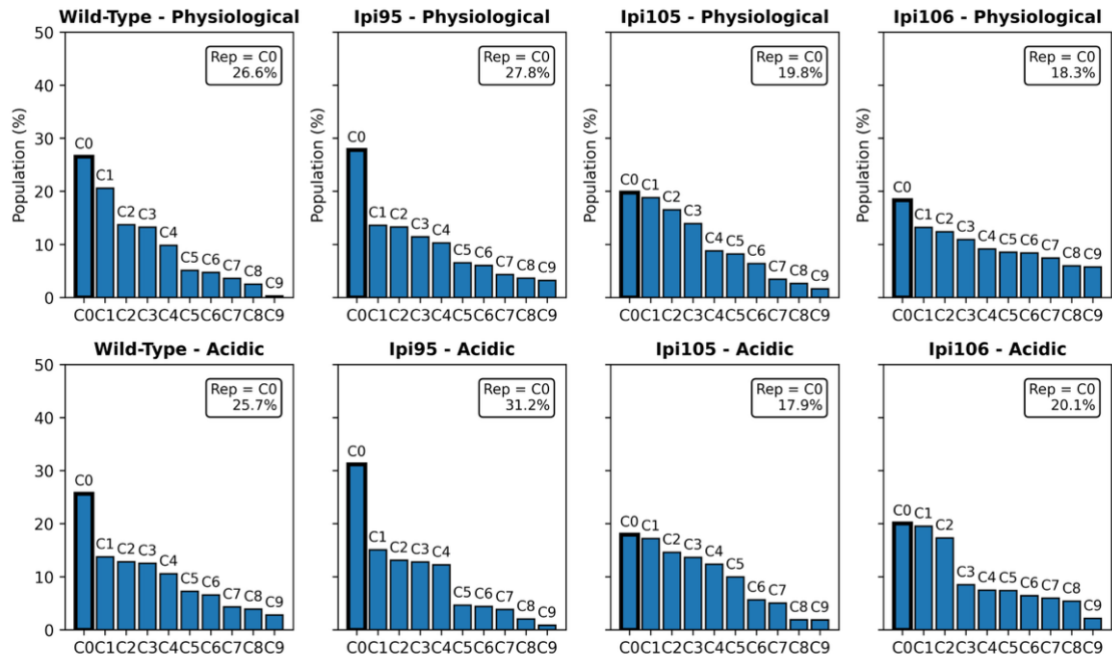

**Figure S6.** A set of representative conformations illustrating structural variability across the 500 ns trajectories for each variant. The *K*-means clustering was conducted using CPPTRAJ,<sup>5</sup> and visualized using ChimeraX.<sup>6</sup>

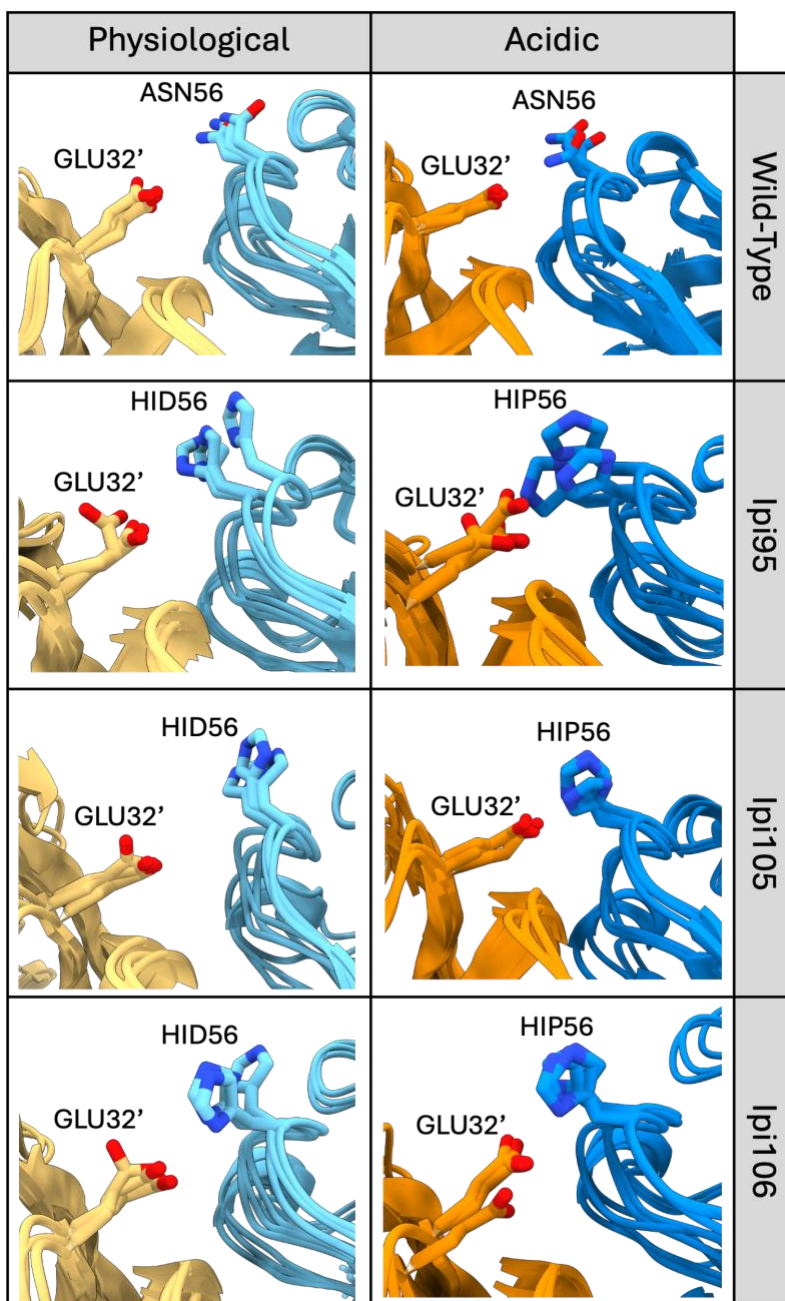

**Figure S7.** The buried SASA of each representative structure in all systems confirms the most prominent Ipilimumab variant (Ipi95) calculated as  $SASA_{\text{antigen}} + SASA_{\text{antibody}} - SASA_{\text{complex}}$ . The SASA analysis was conducted using CPPTRAJ.<sup>5</sup> The plot was created with ggplot2 in JupyterLab.<sup>4</sup>

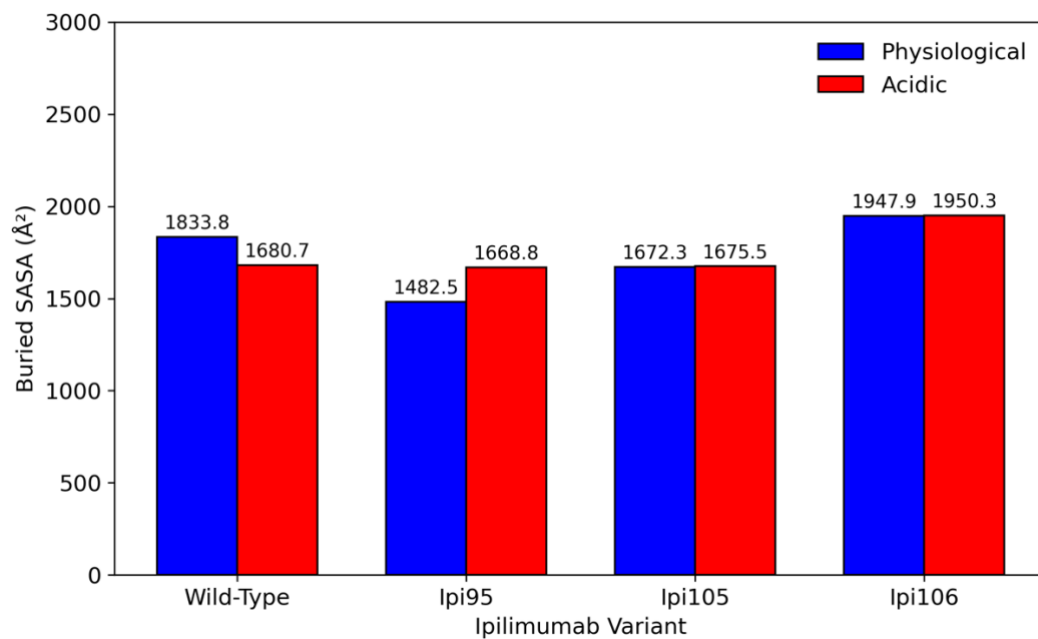

## REFERENCES

- 1 T. J. Dolinsky, P. Czodrowski, H. Li, J. E. Nielsen, J. H. Jensen, G. Klebe and N. A. Baker, PDB2PQR: Expanding and upgrading automated preparation of biomolecular structures for molecular simulations, *Nucleic Acids Res.*, 2007, **35**, 522–525.
- 2 D. S. BIOVIA, Biovia Discovery Studio 2024, *Dassault Systèmes*, 2024.
- 3 B. R. Miller, T. D. McGee, J. M. Swails, N. Homeyer, H. Gohlke and A. E. Roitberg, MMPBSA.py: An efficient program for end-state free energy calculations, *J. Chem. Theory Comput.*, 2012, **8**, 3314–3321.
- 4 H. Wickham, *ggplot2: Elegant Graphics for Data Analysis*, Springer, New York, 1st edn., 2009.
- 5 D. R. Roe and T. E. Cheatham, PTRAJ and CPPTRAJ: Software for processing and analysis of molecular dynamics trajectory data, *J. Chem. Theory Comput.*, 2013, **9**, 3084–3095.
- 6 E. F. Pettersen, T. D. Goddard, C. C. Huang, E. C. Meng, G. S. Couch, T. I. Croll, J. H. Morris and T. E. Ferrin, UCSF ChimeraX: Structure visualization for researchers, educators, and developers, 2021, **30**, 70–82.
- 7 A. Del Conte, G. F. Camagni, D. Clementel, G. Minervini, A. M. Monzon, C. Ferrari, D. Piovesan and S. C. E. Tosatto, RING 4.0: Faster residue interaction networks with novel interaction types across over 35,000 different chemical structures, *Nucleic Acids Res.*, 2024, **52**, W306–W312.
